# Supplementary material
Source: PubMed Central journal article supplement (PMC7997310)

Figure S1. DR curves for top ranking promising hits. Solid circles represent data from pseudotyped particle assay, blank squares represent data from cytotoxicity counterscreen.

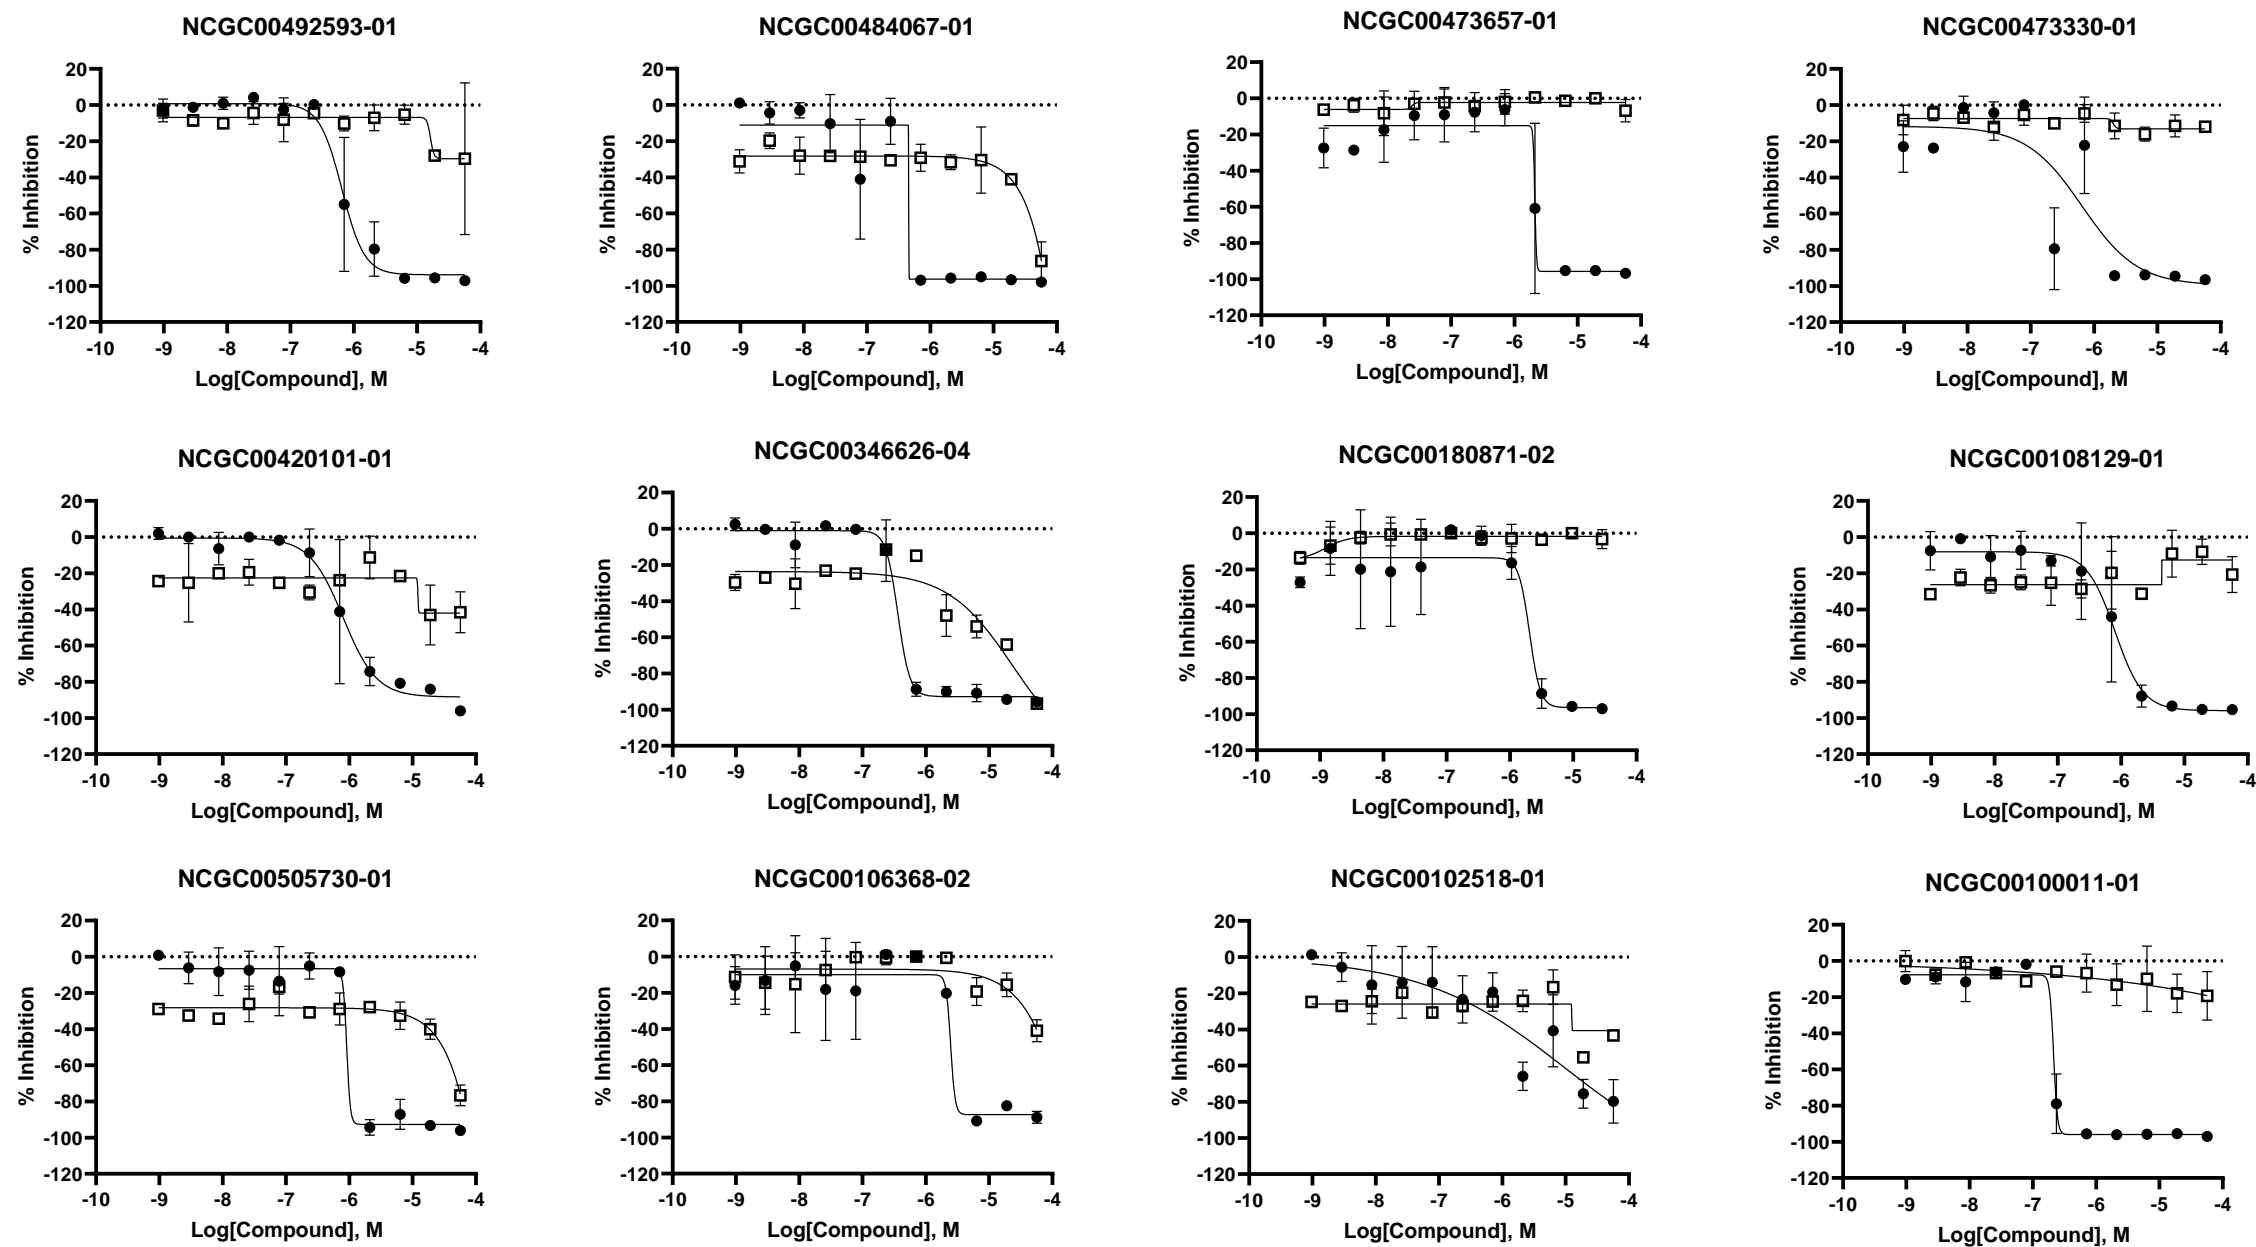

Supplement: mmc1.pdf [file mmc1.pdf]
